# Supplementary material for: Associations Between Physical Activity, Bone Mineral Density, and Low Bone Mass in U.S. Adolescents Aged 12–19 Years: A SHAP‑Based Machine‑Learning Study of NHANES 2011–2018
Source: Research Square preprint supplement (doi:10.21203/rs.3.rs-6776023/v1), 2025-06-09
Supplement: Supplementary file 1 [file 91c679f2e86c95e05e82b19c.docx]

Supplementary Material

Supplementary Table 1

Supplementary Figure 1

Supplementary Table 1. Thresholds for Defining Low Bone Mass Conditions Based on Skeletal Site-Specific BMD Distributions

| Skeletal Site(g/cm^2) | Mean | SD | Mean-2.5SD | Mean-SD | Osteoporosis | Osteopenia | Normal BMD |
| --- | --- | --- | --- | --- | --- | --- | --- |
| [Lumbar Spine BMD](#DXXLSBMD) | 0.98 | 0.16 | 0.58 | 0.82 | ≤0.58 | 0.58<且<0.82 | ≥0.82 |
| [Pelvis BMD](#DXXPEBMD) | 1.19 | 0.19 | 0.72 | 1.00 | ≤0.72 | 0.72<且<1.00 | ≥1.00 |
| [Total Bone Mineral Density](#DXDTOBMD) | 1.04 | 0.12 | 0.74 | 0.92 | ≤0.74 | 0.74<且<0.92 | ≥0.92 |


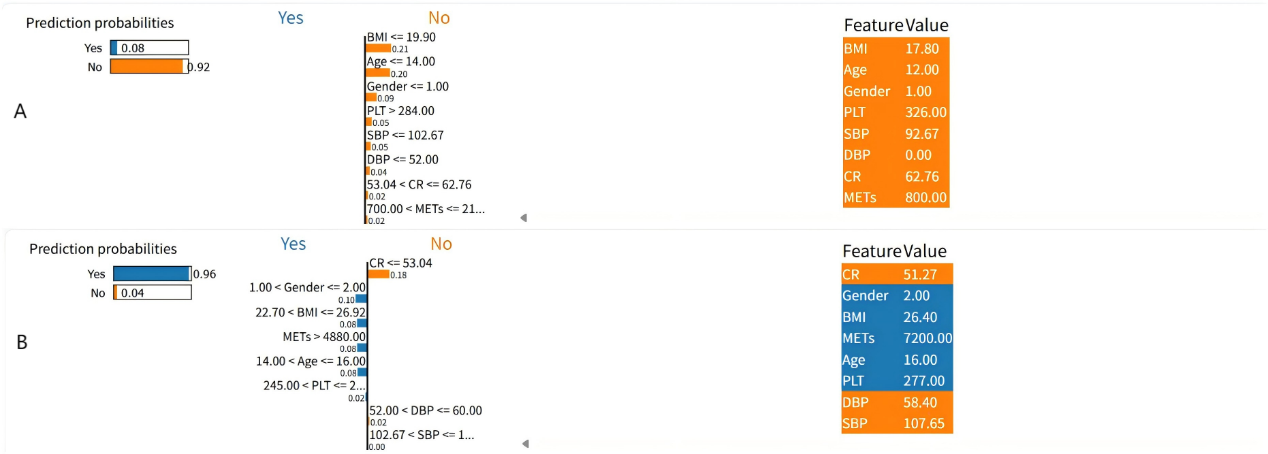


Supplementary Figure 1. LIME-based individual prediction explanations for low bone mass risk. (A) Prediction interpretation for an individual classified as low risk (predicted probability = 0.08), illustrating protective factors such as low BMI, young age, male gender, and high physical activity; (B) Prediction interpretation for an individual classified as high risk (predicted probability = 0.96), highlighting risk factors including higher creatinine, female gender, older age, and elevated BMI.
